# Supplementary material for: Construction of hydrothermally stable beryllium phosphite open-frameworks with high proton conductivity
Source: Royal Society of Chemistry journal article supplement (doi:10.1039/c7ce00948h), 2017-01-01
Supplement: c7ce00948h1.pdf [file c7ce00948h1.pdf]

## **Construction of Hydrothermally Stable Beryllium Phosphite Open-Frameworks with High Proton Conductivity**

Kangcai Wang,<sup>a, ‡</sup> Yunhe Jin,<sup>a, ‡</sup> Linhai Jiang,<sup>b, \*</sup> Zhi Wang,<sup>a</sup> and Qinghua Zhang<sup>a, \*</sup>

<sup>a</sup>Research Center of Energetic Material Genome Science, Institute of Chemical Materials, China Academy of Engineering Physics (CAEP), Mianyang, 621900, P. R. China.

<sup>b</sup>Southwest University of Science and Technology, Mianyang, 621900, P. R. China.

### **Table of contents**

|           |                                                                           |
|-----------|---------------------------------------------------------------------------|
| Pages 2   | TGA and DSC                                                               |
| Pages 3-5 | Structural illustration and selected bond lengths and angles              |
| Pages 6   | Nyquist plots of compounds <b>1</b> and <b>2</b> at different conditions. |

## 1. TGA and DSC

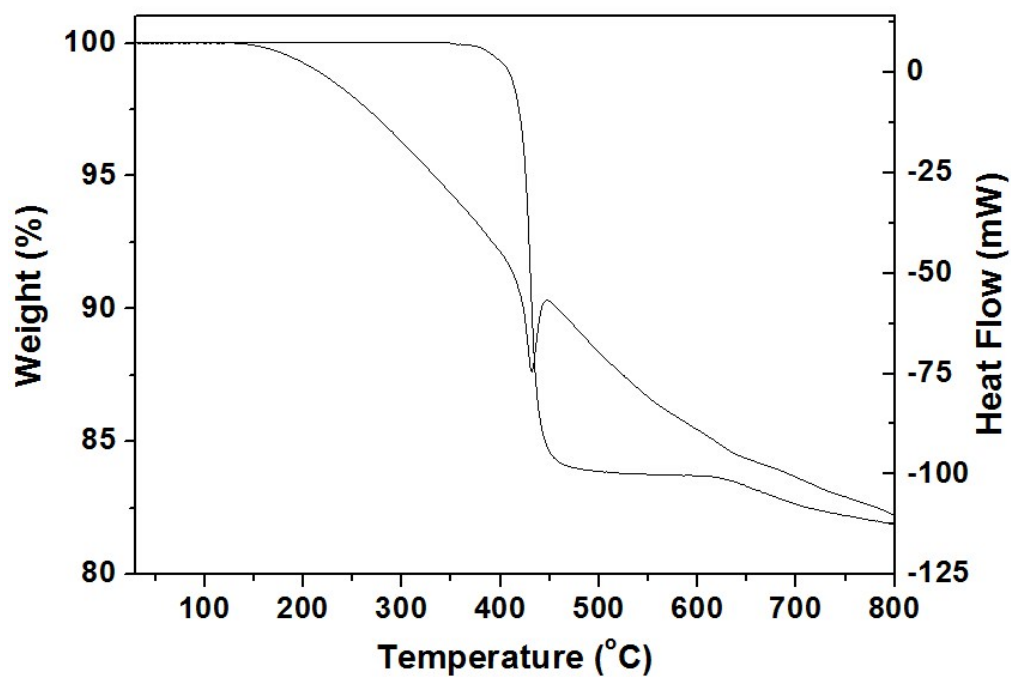

Fig. S1. The TGA and DSC curves of compound 1.

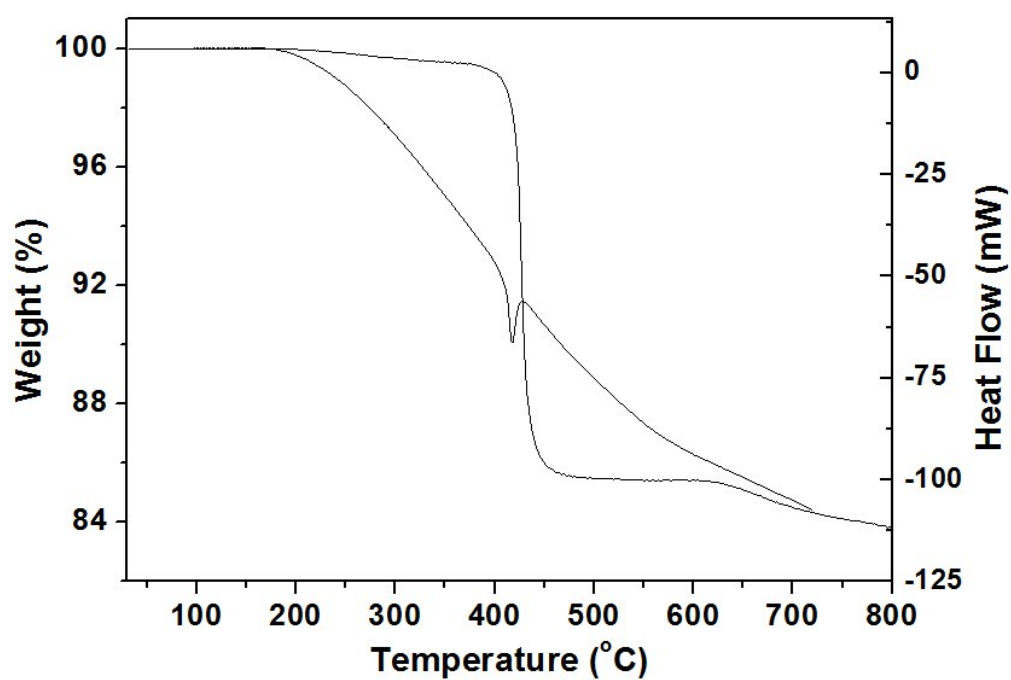

Fig. S2. The TGA and DSC curves of compound 2.

## 2. Structural illustration and selected bond lengths and angles

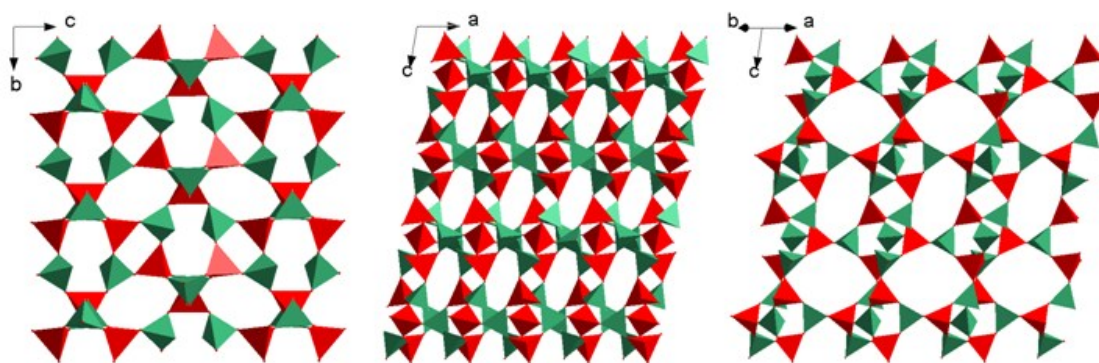

**Fig. S3.** Polyhedral view of compound **1** along different directions.

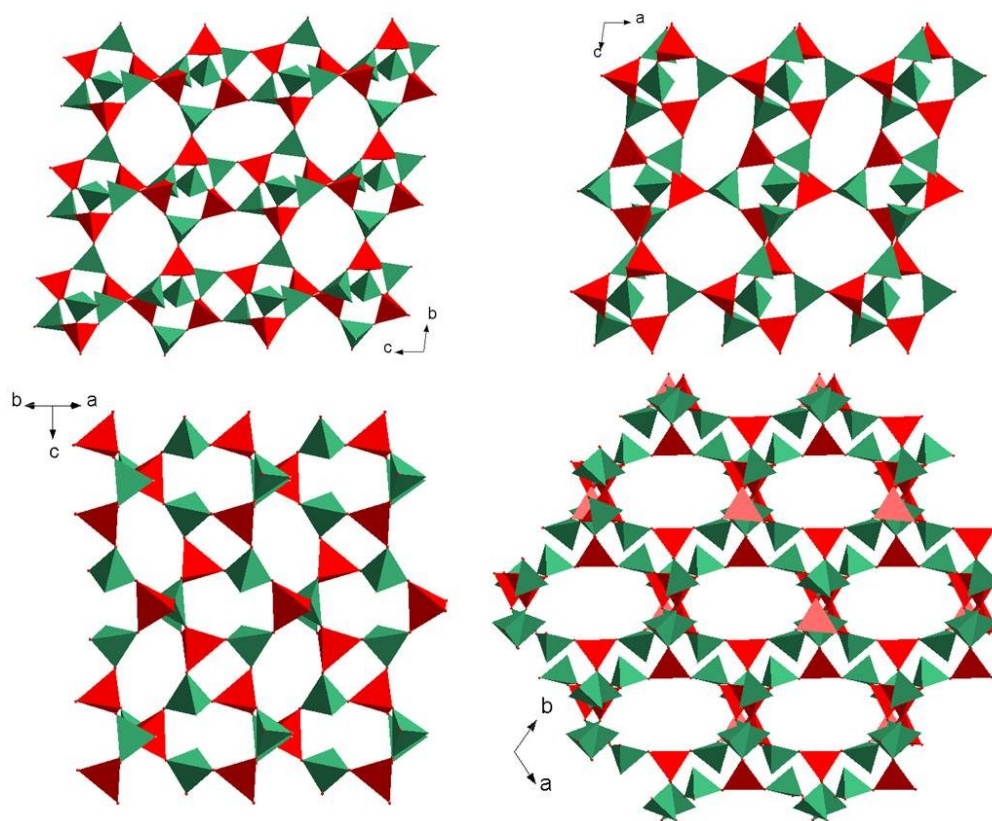

**Fig. S4** Polyhedral view of compound **2** along different directions.

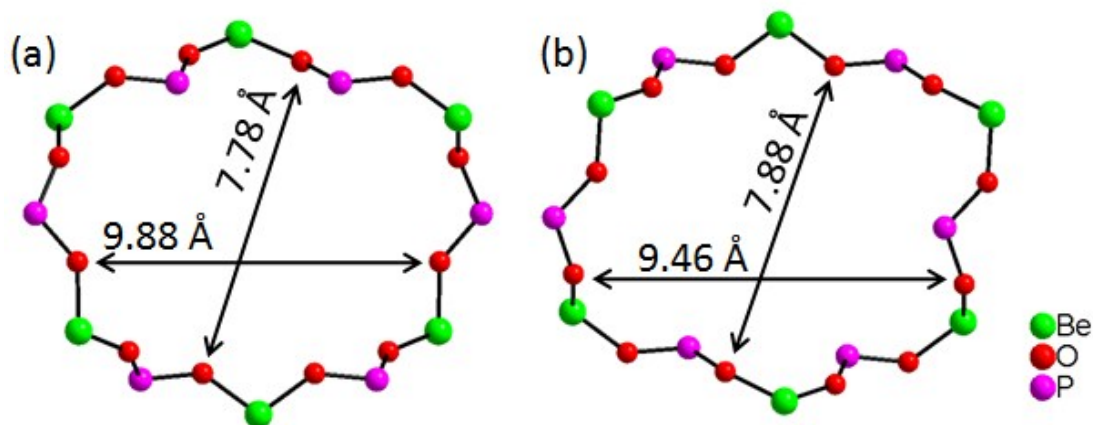

Fig. S5. The 12-members ring window contained in compound 1 (a) and 2 (b).

Table S1 The selected bond lengths [Å] and angles [°] of compound 1.

|                                      |          |                        |           |
|--------------------------------------|----------|------------------------|-----------|
| Be1-O2 <sup>1</sup>                  | 1.625(4) | Be2 <sup>3</sup> -O1   | 1.623(3)  |
| Be1-O3                               | 1.627(3) | P1-O1                  | 1.520(2)  |
| Be1-O4                               | 1.617(4) | P1-O2                  | 1.505(2)  |
| Be1-O5 <sup>2</sup>                  | 1.625(4) | P1-O3                  | 1.507(2)  |
| Be2-O1 <sup>3</sup>                  | 1.632(3) | P1-O4                  | 1.506(2)  |
| Be2-O1 <sup>4</sup>                  | 1.632(3) | P2-O5                  | 1.509(2)  |
| Be2-O6                               | 1.623(3) | P2-O6                  | 1.512(2)  |
| Be2-O6 <sup>5</sup>                  | 1.623(3) | Be1 <sup>2</sup> -O5   | 1.625(4)  |
| O2 <sup>1</sup> -Be1-O3              | 109.8(2) | P1-O1-Be2 <sup>3</sup> | 141.6(2)  |
| O2 <sup>1</sup> -Be1-O5 <sup>2</sup> | 104.4(2) | P1-O2-Be1 <sup>1</sup> | 138.0(2)  |
| O2 <sup>1</sup> -Be1-O4              | 110.8(2) | P1-O3-Be1              | 137.2(2)  |
| O3-Be1-O4                            | 109.6(2) | P2-O4-Be1              | 140.7(2)  |
| O4-Be1-O5 <sup>2</sup>               | 116.7(2) | P2-O5-Be1 <sup>2</sup> | 144.4(2)  |
| O3-Be1-O5 <sup>2</sup>               | 105.3(2) | P2-O6-Be2              | 135.5(2)  |
| O1 <sup>3</sup> -Be2-O1 <sup>4</sup> | 110.7(3) | O2-P1-O1               | 110.8(2)  |
| O6-Be2-O1 <sup>3</sup>               | 107.8(2) | O2-P1-O3               | 114.1(2)  |
| O6 <sup>5</sup> -Be2-O1 <sup>4</sup> | 107.8(2) | O3-P1-O1               | 109.4(2)  |
| O6 <sup>5</sup> -Be2-O1 <sup>3</sup> | 111.3(2) | O4-P2-O5               | 113.68(2) |
| O6-Be2-O1 <sup>4</sup>               | 111.3(2) | O4-P2-O6               | 110.8(2)  |
| O6 <sup>5</sup> -Be2-O6              | 107.8(3) | O5-P2-O6               | 110.9(2)  |

<sup>1</sup>1-X,1-Y,1-Z; <sup>2</sup>1-X,+Y,3/2-Z; <sup>3</sup>3/2-X,1/2-Y,1-Z; <sup>4</sup>1/2+X,1/2-Y,1/2+Z; <sup>5</sup>2-X,+Y,3/2-Z

**Table S2.** The selected bond lengths [ $\text{\AA}$ ] and angles [ $^\circ$ ] of compound **2**.

|                                       |          |                        |           |
|---------------------------------------|----------|------------------------|-----------|
| Be1-O2 <sup>1</sup>                   | 1.619(5) | Be2 <sup>2</sup> -O1   | 1.630(5)  |
| Be1-O3                                | 1.628(5) | P1-O1                  | 1.521(3)  |
| Be1-O4                                | 1.595(5) | P1-O2                  | 1.509(3)  |
| Be1-O7                                | 1.633(5) | P1-O3                  | 1.502(3)  |
| Be2-O1 <sup>2</sup>                   | 1.630(5) | P3-O4                  | 1.511(3)  |
| Be2-O5                                | 1.627(5) | P3-O5                  | 1.511(3)  |
| Be2-O8 <sup>3</sup>                   | 1.619(5) | P3-O6                  | 1.505(5)  |
| Be2-O12 <sup>4</sup>                  | 1.624(5) | Be1 <sup>1</sup> -O2   | 1.619(5)  |
| Be3-O6                                | 1.610(5) | P2-O7                  | 1.512(3)  |
| Be3-O9                                | 1.605(5) | Be2 <sup>6</sup> -O8   | 1.619(5)  |
| Be3-O10                               | 1.634(5) | P2-O8                  | 1.509(3)  |
| Be3-O11 <sup>5</sup>                  | 1.632(5) | P4-O11                 | 1.513(3)  |
| O2 <sup>1</sup> -Be1-O3               | 109.6(3) | P1-O1-Be2 <sup>2</sup> | 141.1(2)  |
| O2 <sup>1</sup> -Be1-O7               | 104.0(3) | P1-O2-Be1 <sup>1</sup> | 137.6(3)  |
| O3-Be1-O7                             | 104.5(3) | P1-O3-Be1              | 140.2(2)  |
| O4-Be1-O2 <sup>1</sup>                | 111.5(3) | P3-O4-Be1              | 142.5(2)  |
| O4-Be1-O3                             | 110.2(3) | P3-O5-Be2              | 136.5(2)  |
| O3-Be1-O7                             | 116.6(3) | P3-O6-Be3              | 145.2(2)  |
| O5-Be2-O1 <sup>2</sup>                | 107.6(3) | O2-P1-O1               | 110.9(2)  |
| O8 <sup>3</sup> -Be2-O1 <sup>2</sup>  | 111.0(3) | O3-P1-O1               | 109.3(2)  |
| O8 <sup>3</sup> -Be2-O12 <sup>4</sup> | 107.7(3) | O3-P1-O2               | 114.5(2)  |
| O12 <sup>4</sup> -Be2-O1 <sup>2</sup> | 110.7(3) | O7-P2-O9               | 113.53(2) |
| O6-Be3-O10                            | 105.5(3) | O8-P2-O7               | 110.9(2)  |
| O6-Be3-O11 <sup>5</sup>               | 105.1(3) | O5-P3-O4               | 110.7(2)  |
| O9-Be3-O6                             | 116.6(3) | O10-P4-O12             | 110.0(2)  |
| O9-Be3-O10                            | 108.7(3) | O11-P4-O12             | 113.3(2)  |

<sup>1</sup>1-X,1-Y,1-Z; <sup>2</sup>-X,1-Y,1-Z; <sup>3</sup>-1+X,-1+Y,+Z; <sup>4</sup>-X,1-Y,-Z; <sup>5</sup>1-X,1-Y,-Z; <sup>6</sup>1+X,1+Y,+Z

3. Nyquist plots of compounds **1** and **2** at different conditions.

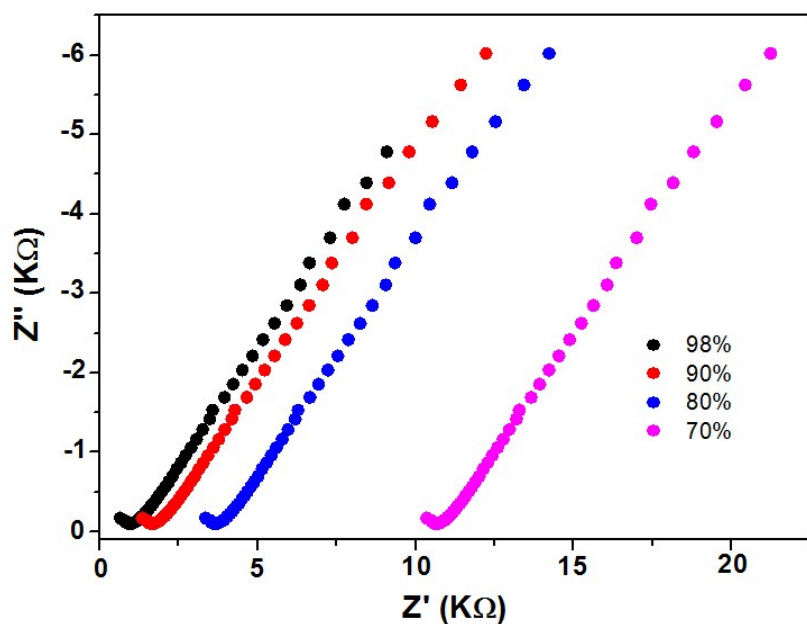

**Fig. S6.** Nyquist plots of compound **1** at 90 °C under different relative humidity from 70% to 98%.

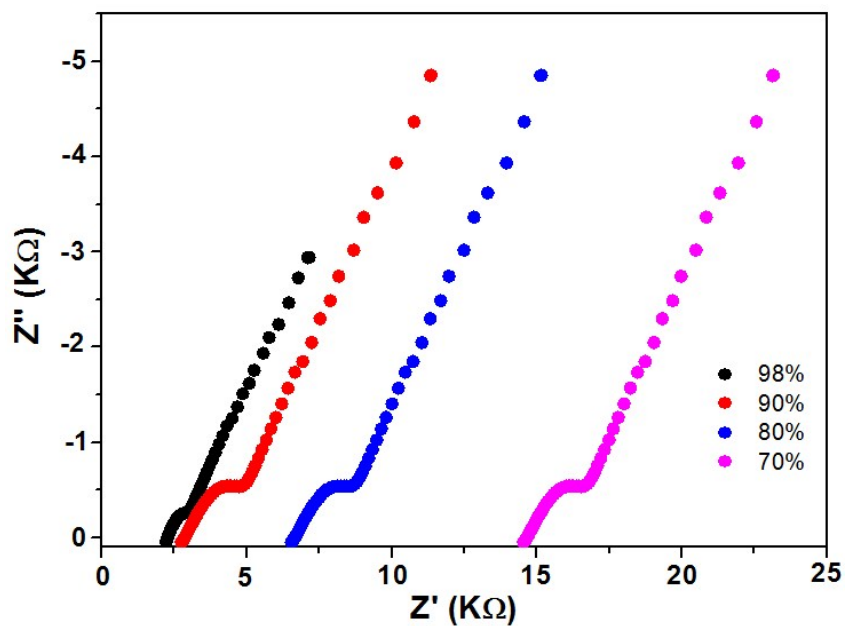

**Fig. S7** Nyquist plots of compound **2** at 90 °C under different relative humidity from 70% to 98%.
